# Supplementary material
Source: HighWire-hosted journal article supplement (https://bmjopenquality.bmj.com/highwire/filestream/136026/field_highwire_adjunct_files/1/ds1860.docx)
Supplement: ds1860.docx [file ds1860.docx]

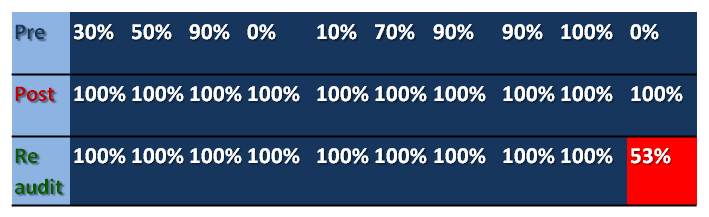
Fig 2. Graph and table to show percentage of discharge letters containing required information prior to, in the month following and in the year following introduction of a discharge proforma.
